# Supplementary material for: Antioxidant Treatment Promotes Prostate Epithelial Proliferation in Nkx3.1 Mutant Mice
Source: PLoS One. 2012 Oct 15;7(10):e46792. doi: 10.1371/journal.pone.0046792 (PMC3471914; doi:10.1371/journal.pone.0046792)
Supplement: Table S2 — Top gene sets depleted in NAC-treated Nkx3.1−/− anterior prostate. GSEA analysis results for top gene sets depleted in NAC-treated Nkx3.1−/− anterior prostate as ranked by Normalized Enrichment Score. Gene set size, Enrichment Score, Normalized Enrichment Score, Nominal p-value, and FDR q-value are provided. Enriched gene sets with a FDR q-value<0.25 are provided (29 gene sets). (XLSX) [file pone.0046792.s002.xlsx]

## Sheet: Table S2
Table S2. Top gene sets depleted in NAC-treated Nkx3.1-/- anterior prostate
* Gene sets with a FDR q-value < 0.25 are listed*
Gene Set Name	Gene Set Size	Enrichment Score	Normalized Enrichment score	NOM p-val	FDR q-val
MOSERLE_IFNA_RESPONSE	20	-0.87486	-2.4193	0	0
TAKEDA_TARGETS_OF_NUP98_HOXA9_FUSION_3D_UP	132	-0.570391	-2.28293	0	0.00326982
DAUER_STAT3_TARGETS_DN	28	-0.743868	-2.26182	0	0.0026229
DER_IFN_BETA_RESPONSE_UP	68	-0.591697	-2.15014	0	0.01806
BENNETT_SYSTEMIC_LUPUS_ERYTHEMATOSUS	18	-0.784516	-2.13526	0.0025974	0.0215811
EINAV_INTERFERON_SIGNATURE_IN_CANCER	22	-0.749972	-2.11971	0	0.0226189
SHEN_SMARCA2_TARGETS_UP	353	-0.473416	-2.10774	0	0.0220312
MILI_PSEUDOPODIA_HAPTOTAXIS_UP	464	-0.464287	-2.10227	0	0.0202733
BROWNE_INTERFERON_RESPONSIVE_GENES	54	-0.610133	-2.08957	0	0.0212177
ZHAN_MULTIPLE_MYELOMA_LB_DN	34	-0.648068	-2.06167	0	0.0295624
TAKEDA_TARGETS_OF_NUP98_HOXA9_FUSION_8D_UP	125	-0.521845	-2.05233	0	0.0300809
KIM_LRRC3B_TARGETS	18	-0.731811	-1.9726	0	0.0777887
LIANG_SILENCED_BY_METHYLATION_2	28	-0.632328	-1.94692	0	0.0943257
DER_IFN_ALPHA_RESPONSE_UP	47	-0.57547	-1.93504	0.00306748	0.0999609
FARMER_BREAST_CANCER_CLUSTER_1	32	-0.62434	-1.88705	0	0.145846
DEBIASI_APOPTOSIS_BY_REOVIRUS_INFECTION_UP	197	-0.441608	-1.87639	0	0.152539
SEITZ_NEOPLASTIC_TRANSFORMATION_BY_8P_DELETION_UP	61	-0.523553	-1.85094	0.0030581	0.182579
MAHADEVAN_RESPONSE_TO_MP470_UP	15	-0.697751	-1.82913	0.00744417	0.209515
TAKEDA_TARGETS_OF_NUP98_HOXA9_FUSION_10D_UP	148	-0.444354	-1.82804	0	0.199729
DACOSTA_UV_RESPONSE_VIA_ERCC3_COMMON_DN	375	-0.406028	-1.82504	0	0.194544
KANG_CISPLATIN_RESISTANCE_UP	15	-0.696238	-1.81353	0	0.205656
DACOSTA_UV_RESPONSE_VIA_ERCC3_XPCS_DN	69	-0.512085	-1.81115	0	0.200519
YANG_BREAST_CANCER_ESR1_BULK_UP	16	-0.691777	-1.8026	0.00952381	0.207167
POMEROY_MEDULLOBLASTOMA_PROGNOSIS_DN	31	-0.572245	-1.78095	0.0184697	0.236864
ZHANG_BREAST_CANCER_PROGENITORS_UP	384	-0.391058	-1.77748	0	0.233415
REACTOME_RNA_POLYMERASE_I_III_AND_MITOCHONDRIAL_TRANSCRIPTION	80	-0.489187	-1.77685	0.00687285	0.225766
SCHLOSSER_MYC_TARGETS_AND_SERUM_RESPONSE_DN	39	-0.545746	-1.76139	0.00533333	0.246945
REACTOME_TRANSCRIPTION	150	-0.429343	-1.75877	0	0.24294
ZHU_CMV_8_HR_UP	27	-0.590366	-1.75805	0.00506329	0.235883
